# Supplementary material for: Vaccine effectiveness against referral to hospital after SARS-CoV-2 infection in St. Petersburg, Russia, during the Delta variant surge: a test-negative case-control study
Source: Springer Nature journal article supplement (doi:10.1186/s12916-022-02509-8), 2022-09-19
Supplement: MOESM1 [file 23516182]

**Supplementary materials**

**Vaccine effectiveness against referral to hospital after SARS-CoV-2 infection in St. Petersburg, Russia during the Delta variant surge: a test-negative case-control study**

Anton Barchuk, Mikhail Cherkashin, Anna Bulina, Natalia Berezina, Tatyana Rakova, Darya Kuplevatskaya, Oksana Stanevich, Dmitriy Skougarevskiy, Artemiy Okhotin.

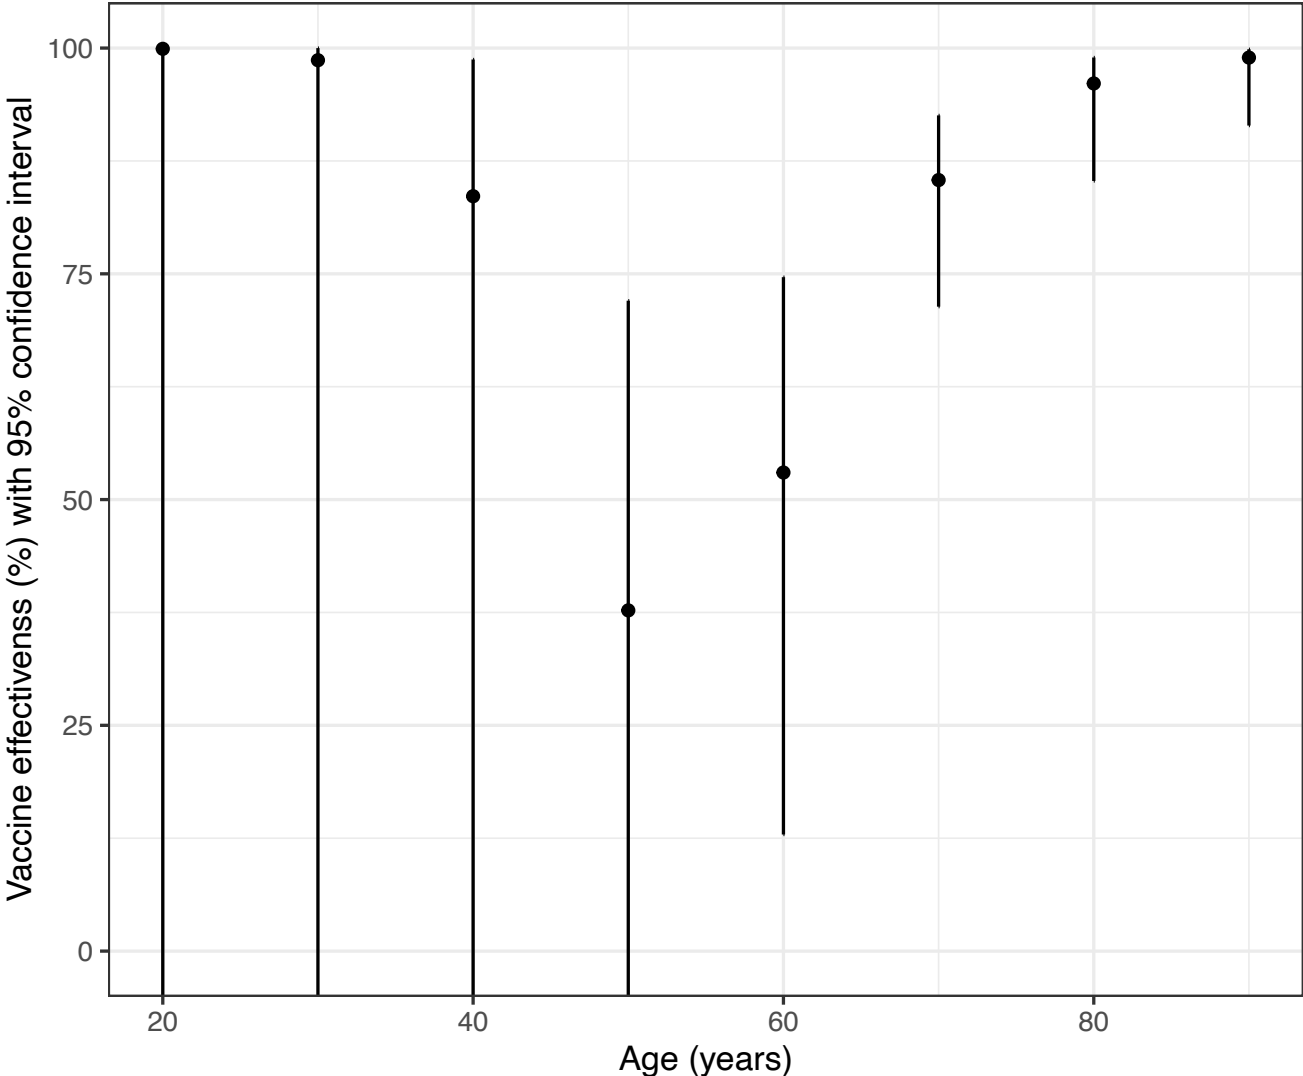

**Figure A1.** Vaccine effectiveness against referral to hospital, according to age.

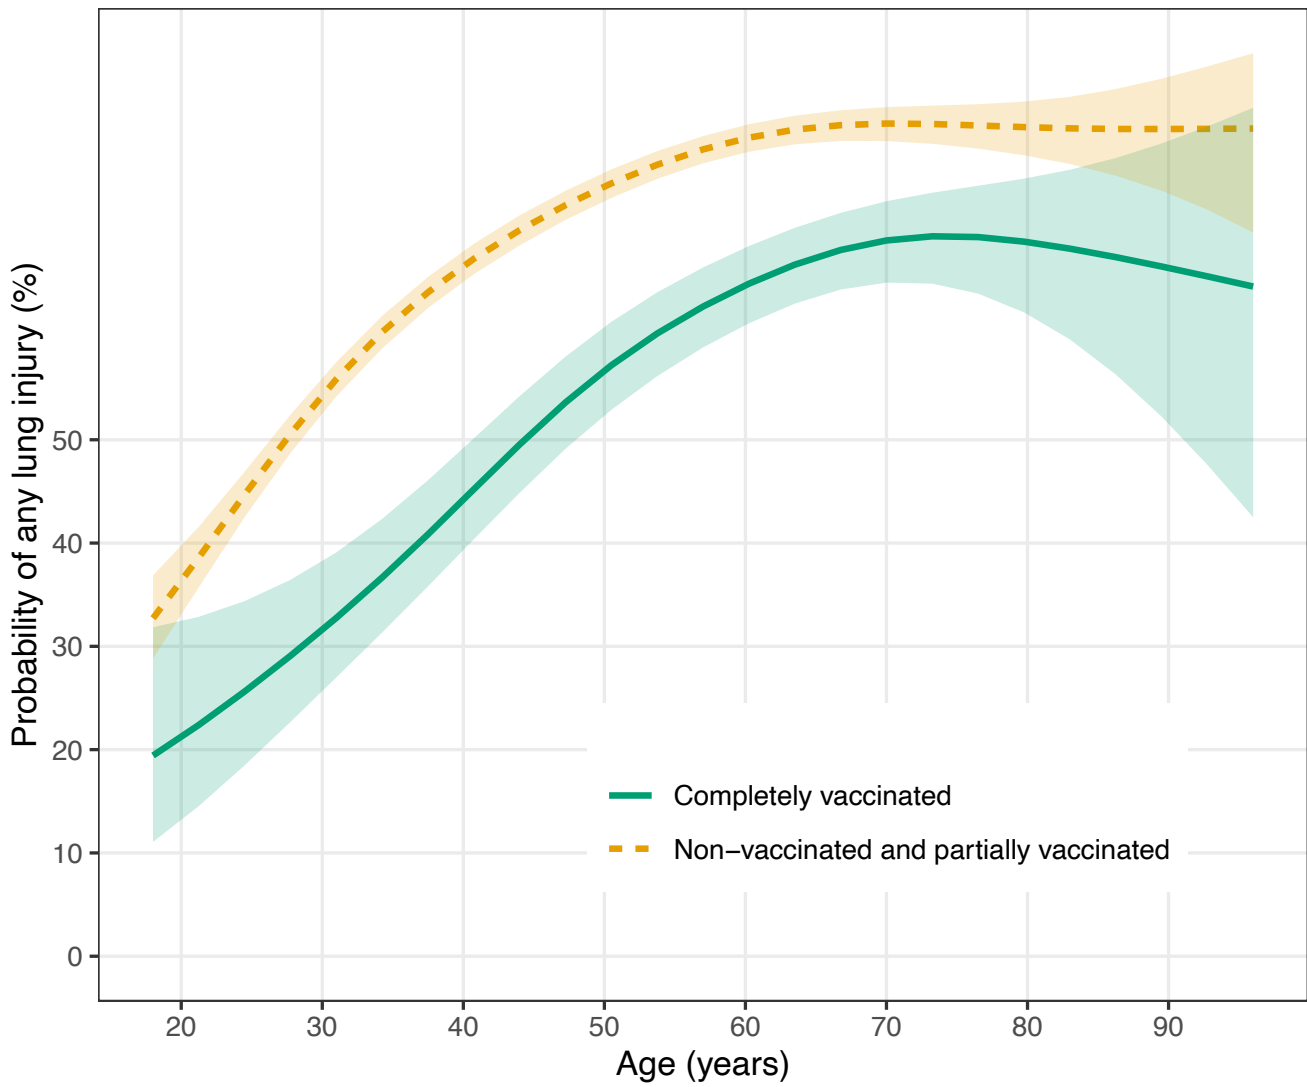

**Figure A2.** Probability of any lung injury, according to age and vaccination status (shaded areas are 95% CI).

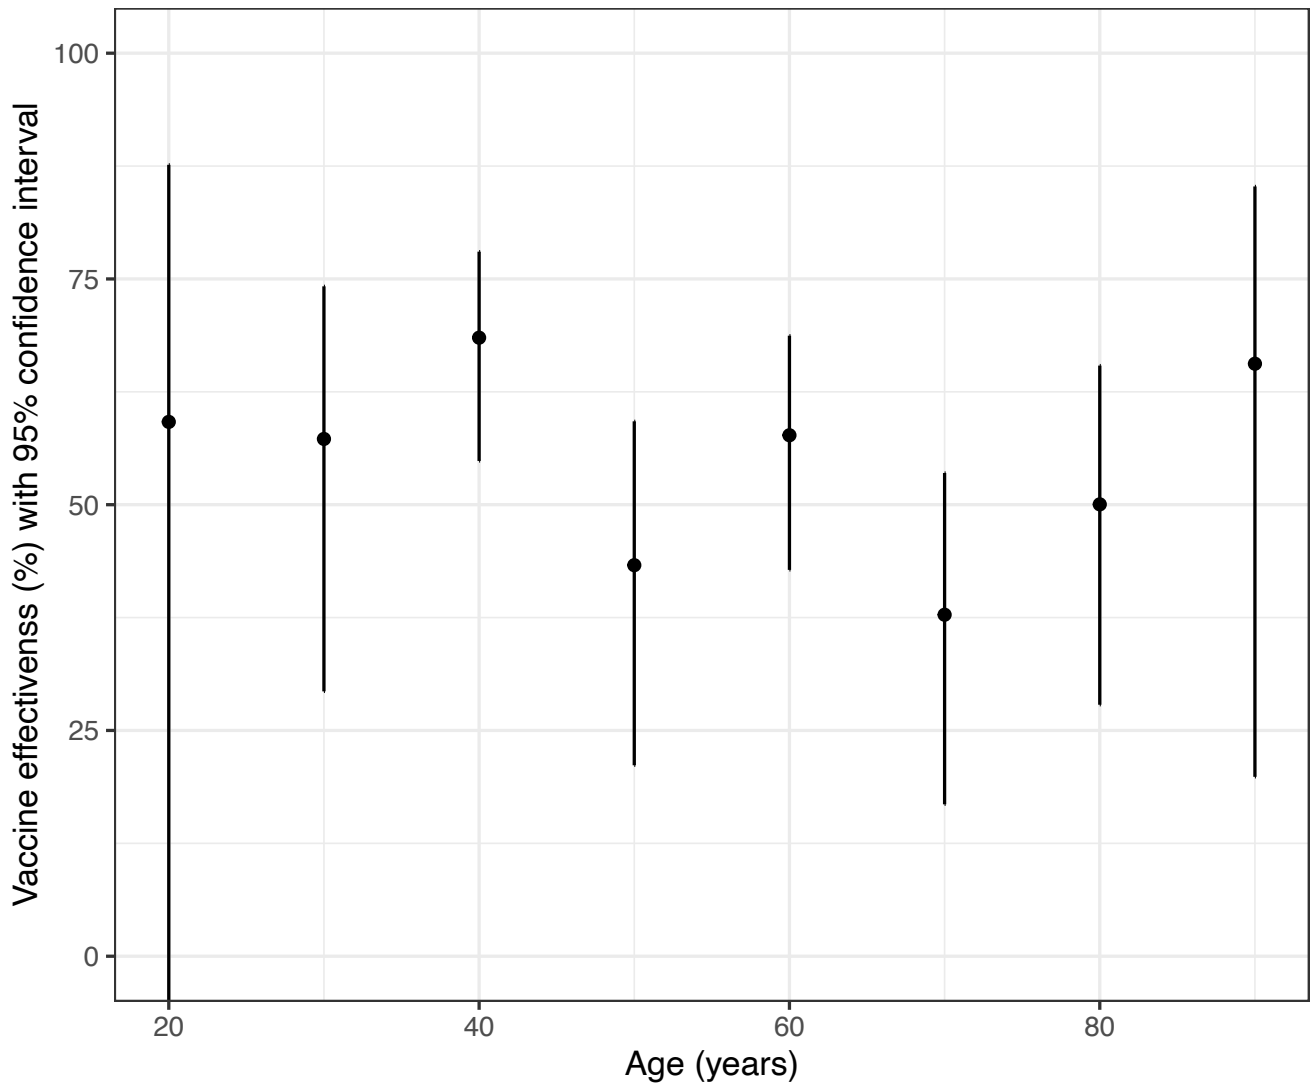

**Figure A3.** Vaccine effectiveness against any lung injury, according to age.
